# Supplementary material for: Religiosity/Spirituality and Cardiovascular Health: The American Heart Association Life's Simple 7 in African Americans of the Jackson Heart Study
Source: PubMed Central journal article supplement — J Am Heart Assoc. 2022 Aug 24;11(17):e024974. doi: 10.1161/JAHA.121.024974 (PMC9496409; doi:10.1161/jaha.121.024974), 2022-08-24
Supplement: JAH3-11-e024974-s001.pdf [file JAH3-11-e024974-s001.pdf]

## **SUPPLEMENTAL MATERIAL**

**Table S1.** Baseline Characteristics of Jackson Heart Study Participants Stratified by Inclusion vs. Exclusion Status\*

| <b>Characteristic</b>                       | <b>Included (N=2,967)</b> | <b>Excluded (N=2,339)</b> | <b>Absolute<br/>Standardized<br/>Difference<sup>†</sup></b> |
|---------------------------------------------|---------------------------|---------------------------|-------------------------------------------------------------|
| Age, y                                      | 54.0 (12.3)               | 57.0 (13.4)               | 0.24                                                        |
| Sex                                         |                           |                           | 0.11                                                        |
| Female                                      | 1949 (66%)                | 1418 (61%)                |                                                             |
| Male                                        | 1018 (34%)                | 921 (39%)                 |                                                             |
| Education                                   |                           |                           |                                                             |
| Less than high school                       | 436 (15%)                 | 670 (29%)                 | 0.35                                                        |
| High school graduate/GED                    | 527 (18%)                 | 439 (19%)                 | 0.03                                                        |
| Vocational/trade school or college graduate | 2000 (67%)                | 1219 (52%)                | 0.31                                                        |
| Income Status                               |                           |                           |                                                             |
| Poor                                        | 296 (12%)                 | 406 (21%)                 | 0.26                                                        |
| Lower-middle                                | 574 (23%)                 | 525 (27%)                 | 0.11                                                        |
| Upper-middle                                | 818 (32%)                 | 509 (26%)                 | 0.13                                                        |
| Affluent                                    | 862 (34%)                 | 496 (26%)                 | 0.18                                                        |
| Health Insured                              | 2583 (87%)                | 1989 (86%)                | 0.05                                                        |
| Married                                     | 1689 (57%)                | 1202 (52%)                | 0.11                                                        |

Cardiovascular Risk Factors

|                            |                |                |      |
|----------------------------|----------------|----------------|------|
| Hypertension               | 1554 (52%)     | 1442 (62%)     | 0.19 |
| Diabetes                   | 512 (17%)      | 656 (29%)      | 0.28 |
| Hyperlipidemia             | 342 (12%)      | 379 (17%)      | 0.15 |
| Current Smoker             | 310 (10%)      | 383 (17%)      | 0.18 |
| LS7 Composite Score        | 7.3 (2.1)      | 6.6 (2.0)      | 0.30 |
| Religiosity Measures       |                |                |      |
| Religious Attendance       | 5.0 (0.9)      | 4.9 (1.0)      | 0.08 |
| Private Prayer             | 7.2 (1.3)      | 7.1 (1.3)      | 0.04 |
| Religious Coping           | 3.6 (0.6)      | 3.5 (0.7)      | 0.05 |
| Spirituality Measures      |                |                |      |
| Theistic Subscale Score    | 14.9 (2.5)     | 14.8 (2.4)     | 0.04 |
| Nontheistic Subscale Score | 14.3 (2.6)     | 14.2 (2.6)     | 0.03 |
| DSES Total Score           | 29.2 (4.7)     | 29.1 (4.7)     | 0.02 |
| Chronic Stress Score       | 4.0 (2.0, 8.0) | 4.0 (1.0, 8.0) | 0.02 |
| Social Network Score       | 4.2 (0.8)      | 4.1 (0.9)      | 0.15 |

\* Data are presented as mean (SD), No. of persons (%) or median (Q1, Q3).

† Difference <0.2 was considered a small effect.<sup>30</sup>

DSES indicates Daily Spiritual Experience Scale; LS7, Life's Simple 7.

**Table S2a.** Baseline Characteristics of Jackson Heart Study Participants by Religious Attendance\*

| Characteristic                              | Few times/year or |                            |                                |                            | <i>P</i><br>value |
|---------------------------------------------|-------------------|----------------------------|--------------------------------|----------------------------|-------------------|
|                                             | less<br>(N=186)   | Few times/month<br>(N=389) | At least once/week<br>(N=1525) | Nearly everyday<br>(N=867) |                   |
| Age, y                                      | 48.8 (11.3)       | 50.5 (11.5)                | 54.7 (12.1)                    | 55.5 (12.5)                | <.001             |
| Sex                                         |                   |                            |                                |                            | <.001             |
| Female                                      | 73 (39%)          | 209 (54%)                  | 1042 (68%)                     | 625 (72%)                  |                   |
| Male                                        | 113 (61%)         | 180 (46%)                  | 483 (32%)                      | 242 (28%)                  |                   |
| Education                                   |                   |                            |                                |                            | <.001             |
| Less than high school                       | 26 (14%)          | 44 (11%)                   | 198 (13%)                      | 168 (19%)                  |                   |
| High school graduate/GED                    | 37 (20%)          | 68 (18%)                   | 247 (16%)                      | 175 (20%)                  |                   |
| Vocational/trade school or college graduate | 123 (66%)         | 276 (71%)                  | 1080 (71%)                     | 521 (60%)                  |                   |
| Income Status                               |                   |                            |                                |                            | 0.002             |
| Poor                                        | 24 (15%)          | 43 (13%)                   | 135 (10%)                      | 94 (13%)                   |                   |
| Lower-middle                                | 34 (22%)          | 71 (21%)                   | 285 (21%)                      | 184 (25%)                  |                   |
| Upper-middle                                | 43 (27%)          | 99 (29%)                   | 426 (32%)                      | 250 (35%)                  |                   |
| Affluent                                    | 57 (36%)          | 125 (37%)                  | 484 (36%)                      | 196 (27%)                  |                   |
| Health Insured                              | 143 (78%)         | 335 (86%)                  | 1361 (89%)                     | 744 (86%)                  | <.001             |
| Married                                     | 93 (50%)          | 207 (53%)                  | 875 (57%)                      | 514 (59%)                  | 0.045             |

|                             |                |                |                |                |       |
|-----------------------------|----------------|----------------|----------------|----------------|-------|
| Cardiovascular risk factors |                |                |                |                |       |
| Hypertension                | 79 (42%)       | 191 (49%)      | 812 (53%)      | 472 (54%)      | 0.012 |
| Diabetes                    | 34 (18%)       | 59 (15%)       | 250 (16%)      | 169 (19%)      | 0.16  |
| Hyperlipidemia              | 20 (11%)       | 42 (11%)       | 174 (11%)      | 106 (12%)      | 0.86  |
| Current smoker              | 48 (26%)       | 71 (18%)       | 137 (9%)       | 54 (6%)        | <.001 |
| LS7 composite score         | 6.9 (2.2)      | 7.2 (2.2)      | 7.3 (2.0)      | 7.3 (2.1)      | 0.17  |
| Religiosity measures        |                |                |                |                |       |
| Private prayer              | 5.6 (2.2)      | 6.6 (1.5)      | 7.3 (1.0)      | 7.7 (0.7)      | <.001 |
| Religious coping            | 3.0 (0.9)      | 3.3 (0.7)      | 3.6 (0.6)      | 3.8 (0.5)      | <.001 |
| Spirituality measures       |                |                |                |                |       |
| Theistic subscale score     | 12.8 (3.3)     | 13.8 (2.9)     | 15.0 (2.2)     | 15.6 (2.0)     | <.001 |
| Nontheistic subscale score  | 11.9 (3.3)     | 13.1 (2.8)     | 14.4 (2.4)     | 15.0 (2.3)     | <.001 |
| DSES total score            | 24.7 (6.1)     | 26.9 (5.3)     | 29.5 (4.2)     | 30.7 (4.0)     | <.001 |
| Chronic stress score        | 5.0 (3.0, 8.0) | 5.0 (2.0, 9.0) | 4.0 (2.0, 7.0) | 4.0 (1.5, 8.0) | 0.009 |
| Social network score        | 3.6 (1.1)      | 4.1 (0.8)      | 4.3 (0.8)      | 4.3 (0.8)      | <.001 |

\* Data are presented as mean (SD), No. of persons (%) or median (Q1, Q3).

**Table S2b.** Baseline Characteristics of Jackson Heart Study Participants by Private Prayer\*

| Characteristic                              | Once/week or less | Few times/week | Once/day    | More than<br>once/day | <i>P</i><br>value |
|---------------------------------------------|-------------------|----------------|-------------|-----------------------|-------------------|
|                                             | (N=219)           | (N=328)        | (N=754)     | (N=1666)              |                   |
| Age, y                                      | 51.7 (11.9)       | 51.4 (11.8)    | 53.7 (12.2) | 55.0 (12.3)           | <.001             |
| Sex                                         |                   |                |             |                       | <.001             |
| Female                                      | 98 (45%)          | 173 (53%)      | 453 (60%)   | 1225 (74%)            |                   |
| Male                                        | 121 (55%)         | 155 (47%)      | 301 (40%)   | 441 (26%)             |                   |
| Education                                   |                   |                |             |                       | 0.007             |
| Less than high school                       | 38 (17%)          | 32 (10%)       | 108 (14%)   | 258 (16%)             |                   |
| High school graduate/GED                    | 35 (16%)          | 44 (13%)       | 133 (18%)   | 315 (19%)             |                   |
| Vocational/trade school or college graduate | 145 (67%)         | 252 (77%)      | 513 (68%)   | 1090 (66%)            |                   |
| Income Status                               |                   |                |             |                       | <.001             |
| Poor                                        | 32 (17%)          | 27 (9%)        | 74 (11%)    | 163 (12%)             |                   |
| Lower-middle                                | 37 (20%)          | 54 (19%)       | 142 (21%)   | 341 (24%)             |                   |
| Upper-middle                                | 52 (28%)          | 84 (29%)       | 200 (30%)   | 482 (34%)             |                   |
| Affluent                                    | 67 (36%)          | 122 (43%)      | 251 (38%)   | 422 (30%)             |                   |
| Health Insured                              | 182 (83%)         | 277 (85%)      | 671 (89%)   | 1453 (87%)            | 0.09              |
| Married                                     | 126 (58%)         | 198 (61%)      | 433 (58%)   | 932 (56%)             | 0.47              |

|                             |                |                |                |                |       |
|-----------------------------|----------------|----------------|----------------|----------------|-------|
| Cardiovascular risk factors |                |                |                |                |       |
| Hypertension                | 104 (47%)      | 147 (45%)      | 388 (51%)      | 915 (55%)      | 0.003 |
| Diabetes                    | 38 (17%)       | 45 (14%)       | 119 (16%)      | 310 (19%)      | 0.10  |
| Hyperlipidemia              | 23 (11%)       | 28 (9%)        | 86 (11%)       | 205 (12%)      | 0.25  |
| Current smoker              | 43 (20%)       | 50 (15%)       | 80 (11%)       | 137 (8%)       | <.001 |
| LS7 composite score         | 6.9 (2.0)      | 7.2 (2.1)      | 7.3 (2.1)      | 7.3 (2.0)      | 0.17  |
| Religiosity measures        |                |                |                |                |       |
| Religious attendance        | 4.0 (1.3)      | 4.6 (0.9)      | 4.9 (0.8)      | 5.3 (0.8)      | <.001 |
| Religious coping            | 3.0 (0.8)      | 3.3 (0.7)      | 3.5 (0.6)      | 3.7 (0.6)      | <.001 |
| Spirituality measures       |                |                |                |                |       |
| Theistic subscale score     | 12.3 (3.5)     | 13.6 (2.7)     | 14.5 (2.2)     | 15.7 (1.9)     | <.001 |
| Nontheistic subscale score  | 11.8 (3.4)     | 13.1 (2.6)     | 13.9 (2.4)     | 15.0 (2.2)     | <.001 |
| DSES total score            | 24.2 (6.2)     | 26.8 (4.9)     | 28.4 (4.3)     | 30.7 (3.8)     | <.001 |
| Chronic stress score        | 4.0 (2.0, 8.0) | 5.0 (2.0, 9.0) | 4.0 (2.0, 8.0) | 4.0 (2.0, 8.0) | 0.10  |
| Social network score        | 4.0 (1.0)      | 4.2 (0.8)      | 4.2 (0.8)      | 4.3 (0.8)      | <.001 |

\* Data are presented as mean (SD), No. of persons (%) or median (Q1, Q3).

**Table S2c.** Baseline Characteristics of Jackson Heart Study Participants by Religious Coping\*

| Characteristic                              | Somewhat                      |                              |                     |                           | <i>P</i><br>value |
|---------------------------------------------|-------------------------------|------------------------------|---------------------|---------------------------|-------------------|
|                                             | Not involved at all<br>(N=42) | Not very involved<br>(N=122) | involved<br>(N=858) | Very involved<br>(N=1892) |                   |
| Age, y                                      | 51.9 (10.4)                   | 51.2 (12.6)                  | 52.6 (12.3)         | 54.7 (12.2)               | <.001             |
| Sex                                         |                               |                              |                     |                           | <.001             |
| Female                                      | 20 (48%)                      | 60 (49%)                     | 533 (62%)           | 1300 (69%)                |                   |
| Male                                        | 22 (52%)                      | 62 (51%)                     | 325 (38%)           | 592 (31%)                 |                   |
| Education                                   |                               |                              |                     |                           | 0.05              |
| Less than high school                       | 11 (26%)                      | 20 (16%)                     | 132 (15%)           | 259 (14%)                 |                   |
| High school graduate/GED                    | 5 (12%)                       | 30 (25%)                     | 155 (18%)           | 324 (17%)                 |                   |
| Vocational/trade school or college graduate | 26 (62%)                      | 72 (59%)                     | 569 (66%)           | 1307 (69%)                |                   |
| Income Status                               |                               |                              |                     |                           | 0.002             |
| Poor                                        | 3 (9%)                        | 13 (12%)                     | 110 (15%)           | 167 (10%)                 |                   |
| Lower-middle                                | 15 (47%)                      | 25 (23%)                     | 177 (24%)           | 346 (21%)                 |                   |
| Upper-middle                                | 6 (19%)                       | 30 (28%)                     | 222 (30%)           | 545 (34%)                 |                   |
| Affluent                                    | 8 (25%)                       | 41 (38%)                     | 235 (32%)           | 567 (35%)                 |                   |
| Health Insured                              | 30 (71%)                      | 100 (83%)                    | 729 (85%)           | 1678 (89%)                | <.001             |
| Married                                     | 24 (57%)                      | 64 (52%)                     | 481 (56%)           | 1089 (58%)                | 0.66              |



|                             |                |                |                |                |       |
|-----------------------------|----------------|----------------|----------------|----------------|-------|
| Cardiovascular risk factors |                |                |                |                |       |
| Hypertension                | 25 (60%)       | 65 (53%)       | 433 (50%)      | 993 (52%)      | 0.57  |
| Diabetes                    | 8 (19%)        | 21 (17%)       | 145 (17%)      | 324 (17%)      | 0.99  |
| Hyperlipidemia              | 2 (5%)         | 16 (13%)       | 105 (12%)      | 213 (11%)      | 0.43  |
| Current smoker              | 10 (24%)       | 25 (20%)       | 111 (13%)      | 157 (8%)       | <.001 |
| LS7 composite score         | 6.8 (1.7)      | 6.9 (2.1)      | 7.1 (2.0)      | 7.4 (2.1)      | 0.002 |
| Religiosity measures        |                |                |                |                |       |
| Religious attendance        | 4.3 (1.7)      | 4.2 (1.2)      | 4.7 (1.0)      | 5.2 (0.8)      | <.001 |
| Private prayer              | 6.0 (2.5)      | 6.0 (2.0)      | 6.8 (1.5)      | 7.5 (0.9)      | <.001 |
| Spirituality measures       |                |                |                |                |       |
| Theistic subscale score     | 13.0 (4.1)     | 12.4 (3.3)     | 13.9 (2.6)     | 15.6 (1.9)     | <.001 |
| Nontheistic subscale score  | 11.5 (4.0)     | 11.3 (3.2)     | 12.9 (2.6)     | 15.1 (2.1)     | <.001 |
| DSES total score            | 24.4 (7.8)     | 23.7 (6.0)     | 26.8 (4.7)     | 30.7 (3.7)     | <.001 |
| Chronic stress score        | 3.5 (1.0, 7.0) | 5.0 (1.0, 8.0) | 4.0 (2.0, 8.0) | 4.0 (2.0, 8.0) | 0.11  |
| Social network score        | 4.0 (0.8)      | 3.9 (1.1)      | 4.2 (0.9)      | 4.3 (0.8)      | <.001 |

\* Data are presented as mean (SD), No. of persons (%) or median (Q1, Q3).

**Table S2d.** Baseline Characteristics of Jackson Heart Study Participants by Theistic Subscale Score\*

| Characteristic                              | Theistic Score                 |                   |                              | Theistic Score 17- | <i>P</i><br>value |
|---------------------------------------------|--------------------------------|-------------------|------------------------------|--------------------|-------------------|
|                                             | Theistic Score 3-13<br>(N=665) | 14-15<br>(N=1039) | Theistic Score 16<br>(N=448) | 18<br>(N=815)      |                   |
| Age, y                                      | 52.1 (12.0)                    | 54.2 (12.0)       | 55.5 (12.4)                  | 54.4 (12.6)        | <.001             |
| Sex                                         |                                |                   |                              |                    | <.001             |
| Female                                      | 357 (54%)                      | 675 (65%)         | 323 (72%)                    | 594 (73%)          |                   |
| Male                                        | 308 (46%)                      | 364 (35%)         | 125 (28%)                    | 221 (27%)          |                   |
| Education                                   |                                |                   |                              |                    | 0.006             |
| Less than high school                       | 80 (12%)                       | 164 (16%)         | 63 (14%)                     | 129 (16%)          |                   |
| High school graduate/GED                    | 118 (18%)                      | 193 (19%)         | 99 (22%)                     | 117 (14%)          |                   |
| Vocational/trade school or college graduate | 466 (70%)                      | 681 (66%)         | 285 (64%)                    | 568 (70%)          |                   |
| Income Status                               |                                |                   |                              |                    | 0.020             |
| Poor                                        | 63 (11%)                       | 109 (12%)         | 48 (13%)                     | 76 (11%)           |                   |
| Lower-middle                                | 120 (21%)                      | 210 (24%)         | 106 (28%)                    | 138 (20%)          |                   |
| Upper-middle                                | 178 (31%)                      | 277 (31%)         | 121 (32%)                    | 242 (34%)          |                   |
| Affluent                                    | 221 (38%)                      | 289 (33%)         | 106 (28%)                    | 246 (35%)          |                   |
| Health Insured                              | 574 (87%)                      | 901 (87%)         | 388 (87%)                    | 720 (88%)          | 0.70              |
| Married                                     | 385 (58%)                      | 606 (59%)         | 242 (54%)                    | 456 (56%)          | 0.37              |

|                             |                |                |                |                |       |
|-----------------------------|----------------|----------------|----------------|----------------|-------|
| Cardiovascular risk factors |                |                |                |                |       |
| Hypertension                | 314 (47%)      | 555 (53%)      | 248 (55%)      | 437 (54%)      | 0.022 |
| Diabetes                    | 98 (15%)       | 188 (18%)      | 84 (19%)       | 142 (17%)      | 0.24  |
| Hyperlipidemia              | 62 (9%)        | 137 (13%)      | 56 (13%)       | 87 (11%)       | 0.07  |
| Current smoker              | 98 (15%)       | 110 (11%)      | 39 (9%)        | 63 (8%)        | <.001 |
| LS7 composite score         | 7.2 (2.0)      | 7.2 (2.1)      | 7.2 (2.1)      | 7.4 (2.0)      | 0.43  |
| Religiosity measures        |                |                |                |                |       |
| Religious attendance        | 4.5 (1.1)      | 5.1 (0.8)      | 5.1 (0.7)      | 5.2 (0.8)      | <.001 |
| Private prayer              | 6.4 (1.8)      | 7.2 (1.1)      | 7.6 (0.8)      | 7.6 (0.8)      | <.001 |
| Religious coping            | 3.2 (0.7)      | 3.6 (0.6)      | 3.7 (0.6)      | 3.8 (0.5)      | <.001 |
| Spirituality measures       |                |                |                |                |       |
| Nontheistic subscale score  | 11.5 (2.6)     | 14.1 (1.7)     | 14.9 (1.6)     | 16.4 (1.7)     | <.001 |
| DSES total score            | 22.7 (3.9)     | 28.8 (1.9)     | 30.9 (1.6)     | 34.0 (2.0)     | <.001 |
| Chronic stress score        | 5.0 (2.0, 8.0) | 4.0 (2.0, 8.0) | 4.0 (1.0, 8.0) | 4.0 (1.0, 7.0) | 0.033 |
| Social network score        | 4.2 (0.9)      | 4.3 (0.8)      | 4.3 (0.8)      | 4.2 (0.8)      | 0.020 |

\* Data are presented as mean (SD), No. of persons (%) or median (Q1, Q3).

**S2e. Baseline Characteristics of Jackson Heart Study Participants by Nontheistic Subscale Score\***

| Characteristic                              | Nontheistic Score | Nontheistic Score | Nontheistic Score | Nontheistic Score | <i>P</i><br>value |
|---------------------------------------------|-------------------|-------------------|-------------------|-------------------|-------------------|
|                                             | 3-12<br>(N=637)   | 13-14<br>(N=697)  | 15<br>(N=702)     | 16-18<br>(N=931)  |                   |
| Age, y                                      | 51.2 (12.1)       | 52.8 (12.0)       | 55.7 (12.0)       | 55.6 (12.3)       | <.001             |
| Sex                                         |                   |                   |                   |                   | <.001             |
| Female                                      | 367 (58%)         | 446 (64%)         | 470 (67%)         | 666 (72%)         |                   |
| Male                                        | 270 (42%)         | 251 (36%)         | 232 (33%)         | 265 (28%)         |                   |
| Education                                   |                   |                   |                   |                   | 0.016             |
| Less than high school                       | 103 (16%)         | 75 (11%)          | 124 (18%)         | 134 (14%)         |                   |
| High school graduate/GED                    | 105 (17%)         | 134 (19%)         | 125 (18%)         | 163 (18%)         |                   |
| Vocational/trade school or college graduate | 428 (67%)         | 488 (70%)         | 452 (64%)         | 632 (68%)         |                   |
| Income Status                               |                   |                   |                   |                   | 0.20              |
| Poor                                        | 76 (14%)          | 70 (12%)          | 78 (13%)          | 72 (9%)           |                   |
| Lower-middle                                | 127 (23%)         | 140 (23%)         | 132 (22%)         | 175 (22%)         |                   |
| Upper-middle                                | 166 (30%)         | 193 (32%)         | 196 (33%)         | 263 (33%)         |                   |
| Affluent                                    | 189 (34%)         | 196 (33%)         | 186 (31%)         | 291 (36%)         |                   |
| Health Insured                              | 536 (84%)         | 609 (88%)         | 621 (89%)         | 817 (88%)         | 0.09              |
| Married                                     | 364 (57%)         | 382 (55%)         | 415 (59%)         | 528 (57%)         | 0.48              |

|                             |                |                |                |                |       |
|-----------------------------|----------------|----------------|----------------|----------------|-------|
| Cardiovascular risk factors |                |                |                |                |       |
| Hypertension                | 299 (47%)      | 364 (52%)      | 379 (54%)      | 512 (55%)      | 0.013 |
| Diabetes                    | 101 (16%)      | 102 (15%)      | 143 (20%)      | 166 (18%)      | 0.027 |
| Hyperlipidemia              | 64 (10%)       | 72 (10%)       | 87 (12%)       | 119 (13%)      | 0.23  |
| Current smoker              | 102 (16%)      | 84 (12%)       | 65 (9%)        | 59 (6%)        | <.001 |
| LS7 composite score         | 7.1 (2.0)      | 7.2 (2.1)      | 7.2 (2.2)      | 7.4 (2.0)      | 0.07  |
| Religiosity measures        |                |                |                |                |       |
| Religious attendance        | 4.6 (1.1)      | 4.9 (0.9)      | 5.1 (0.8)      | 5.3 (0.7)      | <.001 |
| Private prayer              | 6.5 (1.7)      | 7.1 (1.2)      | 7.4 (1.0)      | 7.6 (0.9)      | <.001 |
| Religious coping            | 3.1 (0.7)      | 3.5 (0.6)      | 3.7 (0.5)      | 3.8 (0.5)      | <.001 |
| Spirituality measures       |                |                |                |                |       |
| Theistic subscale score     | 12.2 (2.7)     | 14.5 (1.7)     | 15.2 (1.4)     | 16.8 (1.5)     | <.001 |
| DSES total score            | 22.6 (4.0)     | 28.1 (1.8)     | 30.2 (1.4)     | 33.8 (2.0)     | <.001 |
| Chronic stress score        | 5.0 (3.0, 9.0) | 5.0 (2.0, 8.0) | 4.0 (1.0, 7.0) | 4.0 (1.0, 7.0) | <.001 |
| Social network score        | 4.1 (1.0)      | 4.2 (0.8)      | 4.3 (0.8)      | 4.3 (0.7)      | <.001 |

\* Data are presented as mean (SD), No. of persons (%) or median (Q1, Q3).

**Table S3.** Logistic Regression Model Summary for Intermediate/Ideal (vs. Poor) Life's Simple 7 Components and Religiosity Measures: Model 1\*

| Component         | Odds Ratio (95% CI) <sup>†,‡</sup>  |                               |                                 |
|-------------------|-------------------------------------|-------------------------------|---------------------------------|
|                   | Religious Attendance<br>OR (95% CI) | Private Prayer<br>OR (95% CI) | Religious Coping<br>OR (95% CI) |
| Physical Activity | <b>1.156 (1.062, 1.259)</b>         | 1.073 (0.987, 1.167)          | <b>1.175 (1.080, 1.278)</b>     |
| Diet              | <b>1.101 (1.011, 1.200)</b>         | <b>1.119 (1.026, 1.220)</b>   | <b>1.103 (1.013, 1.200)</b>     |
| Smoking           | <b>1.499 (1.342, 1.675)</b>         | <b>1.244 (1.117, 1.386)</b>   | <b>1.318 (1.176, 1.477)</b>     |
| BMI               | 1.004 (0.925, 1.091)                | 1.012 (0.932, 1.099)          | 1.009 (0.930, 1.096)            |
| Blood Pressure    | <b>1.115 (1.005, 1.237)</b>         | 1.053 (0.950, 1.168)          | 1.014 (0.912, 1.128)            |
| Total Cholesterol | 1.033 (0.921, 1.158)                | 1.016 (0.906, 1.139)          | 0.937 (0.832, 1.056)            |
| FPG               | 1.028 (0.915, 1.155)                | 0.961 (0.851, 1.085)          | 1.023 (0.911, 1.149)            |
| LS7 Composite     | <b>1.153 (1.057, 1.257)</b>         | 1.058 (0.971, 1.153)          | <b>1.135 (1.041, 1.237)</b>     |

BMI, body mass index; FPG, fasting plasma glucose; LS7, Life's Simple 7.

\* Model 1: adjusted for age, sex, education, income, and insurance status.

† Odds ratios of achieving intermediate/ideal levels vs. poor levels (reference) of LS7. Odds ratios are per 1-SD unit increase in religiosity measure.

‡ Bold indicates statistical significance ( $P < .05$ ).

**Table S4.** Logistic Regression Model Summary for Intermediate/Ideal (vs. Poor) Life's Simple 7 Components and Religiosity Measures: Model 2\*

| Component         | Odds Ratio (95% CI) <sup>†,‡</sup>  |                               |                                 |
|-------------------|-------------------------------------|-------------------------------|---------------------------------|
|                   | Religious Attendance<br>OR (95% CI) | Private Prayer<br>OR (95% CI) | Religious Coping<br>OR (95% CI) |
| Physical Activity | <b>1.160 (1.066, 1.263)</b>         | 1.074 (0.988, 1.167)          | <b>1.172 (1.077, 1.275)</b>     |
| Diet              | <b>1.108 (1.017, 1.208)</b>         | <b>1.116 (1.023, 1.216)</b>   | <b>1.097 (1.008, 1.195)</b>     |
| Smoking           | <b>1.502 (1.344, 1.679)</b>         | <b>1.244 (1.117, 1.386)</b>   | <b>1.314 (1.172, 1.473)</b>     |
| BMI               | 1.007 (0.927, 1.094)                | 1.012 (0.932, 1.099)          | 1.006 (0.927, 1.093)            |
| Blood Pressure    | <b>1.119 (1.008, 1.241)</b>         | 1.056 (0.952, 1.170)          | 1.019 (0.916, 1.134)            |
| Total Cholesterol | 1.027 (0.915, 1.153)                | 1.016 (0.906, 1.140)          | 0.943 (0.837, 1.063)            |
| FPG               | 1.031 (0.917, 1.158)                | 0.964 (0.854, 1.089)          | 1.023 (0.910, 1.150)            |
| LS7 Composite     | <b>1.157 (1.061, 1.262)</b>         | 1.058 (0.971, 1.154)          | <b>1.133 (1.039, 1.235)</b>     |

BMI, body mass index; FPG, fasting plasma glucose; LS7, Life's Simple 7.

\* Model 2: adjusted for age, sex, education, income, insurance status, and chronic stress.

† Odds ratios of achieving intermediate/ideal levels vs. poor levels (reference) of LS7. Odds ratios are per 1-SD unit increase in religiosity measure.

‡ Bold indicates statistical significance ( $P < .05$ ).

**Table S5.** Logistic Regression Model Summary for Intermediate/Ideal (vs. Poor) Life's Simple 7 Components and Religiosity Measures: Model 3\*

| Component         | Odds Ratio (95% CI) <sup>†,‡</sup>  |                               |                                 |
|-------------------|-------------------------------------|-------------------------------|---------------------------------|
|                   | Religious Attendance<br>OR (95% CI) | Private Prayer<br>OR (95% CI) | Religious Coping<br>OR (95% CI) |
| Physical Activity | <b>1.161 (1.064, 1.266)</b>         | 1.067 (0.981, 1.161)          | <b>1.173 (1.078, 1.277)</b>     |
| Diet              | <b>1.125 (1.031, 1.229)</b>         | <b>1.121 (1.027, 1.223)</b>   | <b>1.101 (1.010, 1.200)</b>     |
| Smoking           | <b>1.452 (1.295, 1.627)</b>         | <b>1.213 (1.087, 1.355)</b>   | <b>1.289 (1.148, 1.448)</b>     |
| BMI               | 1.005 (0.923, 1.094)                | 1.007 (0.926, 1.094)          | 1.007 (0.927, 1.094)            |
| Blood Pressure    | <b>1.118 (1.006, 1.244)</b>         | 1.060 (0.956, 1.176)          | 1.016 (0.912, 1.132)            |
| Total Cholesterol | 1.021 (0.908, 1.149)                | 1.011 (0.901, 1.136)          | 0.940 (0.833, 1.060)            |
| FPG               | 1.017 (0.903, 1.146)                | 0.959 (0.848, 1.085)          | 1.017 (0.903, 1.144)            |
| LS7 Composite     | <b>1.134 (1.038, 1.239)</b>         | 1.044 (0.956, 1.139)          | <b>1.119 (1.026, 1.221)</b>     |

BMI, body mass index; FPG, fasting plasma glucose; LS7, Life's Simple 7.

\* Model 3: adjusted for age, sex, education, income, insurance status, chronic stress, and social network.

† Odds ratios of achieving intermediate/ideal levels vs. poor levels (reference) of LS7. Odds ratios are per 1-SD unit increase in religiosity measure.

‡ Bold indicates statistical significance ( $P < .05$ ).



**Table S6.** Logistic Regression Model Summary for Intermediate/Ideal (vs. Poor) Life's Simple 7 Components and Spirituality Measures: Model 1\*

| Component         | Odds Ratio (95% CI) <sup>†,‡</sup> |                                  |                              |
|-------------------|------------------------------------|----------------------------------|------------------------------|
|                   | Theistic Subscale OR (95% CI)      | Nontheistic Subscale OR (95% CI) | DSES Total Score OR (95% CI) |
| Physical Activity | 1.053 (0.970, 1.144)               | <b>1.149 (1.057, 1.249)</b>      | <b>1.110 (1.021, 1.206)</b>  |
| Diet              | 1.043 (0.961, 1.133)               | 1.044 (0.961, 1.134)             | 1.047 (0.964, 1.138)         |
| Smoking           | <b>1.274 (1.132, 1.434)</b>        | <b>1.380 (1.226, 1.554)</b>      | <b>1.357 (1.205, 1.528)</b>  |
| BMI               | 0.999 (0.921, 1.083)               | 1.001 (0.923, 1.086)             | 1.000 (0.922, 1.085)         |
| Blood Pressure    | 0.991 (0.892, 1.101)               | 1.103 (0.994, 1.225)             | 1.051 (0.946, 1.167)         |
| Total Cholesterol | 0.970 (0.864, 1.088)               | 0.960 (0.855, 1.077)             | 0.962 (0.857, 1.079)         |
| FPG               | 0.914 (0.811, 1.029)               | 0.913 (0.811, 1.027)             | 0.906 (0.805, 1.021)         |
| LS7 Composite     | 1.057 (0.971, 1.152)               | 1.084 (0.995, 1.182)             | 1.077 (0.988, 1.174)         |

BMI, body mass index; DSES, Daily Spiritual Experience Scale; FPG, fasting plasma glucose; LS7, Life's Simple 7.

\* Model 1: adjusted for age, sex, education, income, and insurance status.

† Odds ratios of achieving intermediate/ideal levels vs. poor levels (reference) of LS7. Odds ratios are per 1-SD unit increase in spirituality measure.

‡ Bold indicates statistical significance ( $P < .05$ ).

**Table S7.** Logistic Regression Model Summary for Intermediate/Ideal (vs. Poor) Life's Simple 7 Components and Spirituality Measures: Model 2\*

| Component         | Odds Ratio (95% CI) <sup>†,‡</sup> |                                  |                              |
|-------------------|------------------------------------|----------------------------------|------------------------------|
|                   | Theistic Subscale OR (95% CI)      | Nontheistic Subscale OR (95% CI) | DSES Total Score OR (95% CI) |
| Physical Activity | 1.051 (0.968, 1.142)               | <b>1.152 (1.059, 1.254)</b>      | <b>1.110 (1.021, 1.207)</b>  |
| Diet              | 1.037 (0.955, 1.127)               | 1.036 (0.952, 1.127)             | 1.040 (0.956, 1.130)         |
| Smoking           | <b>1.259 (1.119, 1.417)</b>        | <b>1.350 (1.198, 1.522)</b>      | <b>1.332 (1.182, 1.500)</b>  |
| BMI               | 0.994 (0.916, 1.078)               | 0.997 (0.918, 1.082)             | 0.995 (0.917, 1.080)         |
| Blood Pressure    | 0.996 (0.896, 1.107)               | <b>1.125 (1.012, 1.250)</b>      | 1.064 (0.958, 1.183)         |
| Total Cholesterol | 0.982 (0.875, 1.102)               | 0.970 (0.863, 1.091)             | 0.974 (0.867, 1.094)         |
| FPG               | 0.912 (0.809, 1.028)               | 0.907 (0.805, 1.023)             | 0.903 (0.801, 1.018)         |
| LS7 Composite     | 1.056 (0.969, 1.151)               | 1.085 (0.995, 1.184)             | 1.077 (0.988, 1.174)         |

BMI, body mass index; DSES, Daily Spiritual Experience Scale; FPG, fasting plasma glucose; LS7, Life's Simple 7.

\* Model 2: adjusted for age, sex, education, income, insurance status, and chronic stress.

† Odds ratios of achieving intermediate/ideal levels vs. poor levels (reference) of LS7. Odds ratios are per 1-SD unit increase in spirituality measure.

‡ Bold indicates statistical significance ( $P < .05$ ).

**Table S8.** Logistic Regression Model Summary for Intermediate/Ideal (vs. Poor) Life's Simple 7 Components and Spirituality Measures: Model 3\*

| Component         | Odds Ratio (95% CI) <sup>†,‡</sup> |                                  |                              |
|-------------------|------------------------------------|----------------------------------|------------------------------|
|                   | Theistic Subscale OR (95% CI)      | Nontheistic Subscale OR (95% CI) | DSES Total Score OR (95% CI) |
| Physical Activity | 1.042 (0.959, 1.133)               | <b>1.147 (1.053, 1.249)</b>      | <b>1.102 (1.013, 1.199)</b>  |
| Diet              | 1.038 (0.955, 1.128)               | 1.039 (0.954, 1.130)             | 1.041 (0.957, 1.133)         |
| Smoking           | <b>1.224 (1.086, 1.379)</b>        | <b>1.312 (1.162, 1.480)</b>      | <b>1.292 (1.145, 1.457)</b>  |
| BMI               | 0.995 (0.917, 1.079)               | 0.997 (0.917, 1.083)             | 0.995 (0.917, 1.081)         |
| Blood Pressure    | 0.983 (0.884, 1.093)               | <b>1.120 (1.007, 1.246)</b>      | 1.055 (0.949, 1.173)         |
| Total Cholesterol | 0.979 (0.872, 1.099)               | 0.966 (0.859, 1.086)             | 0.970 (0.863, 1.090)         |
| FPG               | 0.910 (0.807, 1.026)               | 0.903 (0.801, 1.020)             | 0.900 (0.797, 1.015)         |
| LS7 Composite     | 1.043 (0.956, 1.137)               | 1.071 (0.981, 1.169)             | 1.062 (0.973, 1.159)         |

BMI, body mass index; DSES, Daily Spiritual Experience Scale; FPG, fasting plasma glucose; LS7, Life's Simple 7.

\* Model 3: adjusted for age, sex, education, income, insurance status, chronic stress, and social network.

† Odds ratios of achieving intermediate/ideal levels vs. poor levels (reference) of LS7. Odds ratios are per 1-SD unit increase in spirituality measure.

‡ Bold indicates statistical significance ( $P < .05$ ).
